# Supplementary material
Source: PubMed Central journal article supplement (PMC2678449)
Supplement: 0900879106_0900879106SI.pdf [file 0900879106_0900879106SI.pdf]

# Supporting Information

Sanz et al. 10.1073/pnas.0900879106

## SI Text

**Cloning the *wcoB* cDNA.** We first amplified the 5' and 3' ends by 2 PCRs using primers (*wcoBR5* and *wcoB4F*, and *wcoBF3* and *wcoB3R* respectively (supporting information (SI) Table S2). The PCR products were digested with *XhoI* and ligated to obtain a *wcoB* cDNA that lacked the last exon. The cDNA sequence comprising the 3' *wcoB* gene was obtained by RACE PCR (1), using the BD Smart RACE cDNA amplification kit (BD Biosciences), oligonucleotide *wcoB-RACE3'* (Table S2), and mRNA from wild type mycelia exposed to blue light (30 min,  $2.34 \cdot 10^3$  J/m<sup>2</sup>). The RACE PCRs yielded a 440-bp DNA segment for the 3' end of the *wcoB* cDNA, which was cloned and sequenced. The complete *wcoB* cDNA was amplified using primers *wcoB5R* and *wcoB4F* (Table S2).

**Bioinformatic Analysis.** Protein domains were predicted using the SMART database (2). Protein comparisons and phylogenetic analysis were performed using the program MEGA4 (3). Phylogenetic trees were performed by the Neighbor-Joining method with corrected distances using the JTT model and pairwise gap deletions, and 1000 bootstrap replicates. Multiple protein alignments were performed with the program ClustalW included in MEGA4.

**Expression of the MADA/MADB Complex in *E. coli*.** *Phycomyces* cDNAs for the MADA and MADB proteins were amplified and cloned into the bacterial expression vectors pGEX4T1 (GST-tag) (GE Healthcare) and pET28a (6XHis) (Novagen). DNA fragments encoding the MADA and MADB proteins were inserted into the BamHI-NotI sites of each plasmid. The fusion proteins were expressed in *E. coli* strain Rosetta2 (DE3) pLysS (Novagen) transformed with each or both recombinant plasmids. Proteins were expressed by adding isopropyl-D-galactopyranoside (0.5 mM, final concentration) to cultures at an OD<sub>600</sub> between 0.4 and 0.5 at 37 °C in LB medium supplemented with ampicillin (100 µg/mL) and kanamycin (30 µg/mL). Expression was carried out in darkness for 4 h at 22 °C. For cell lysis, bacteria were frozen overnight at -20 °C, resuspended in 1X Bugbuster lysis buffer (Novagen), and incubated 20 min at room temperature on a wheel mixer to complete the lysis, or lysed with a French pressure cell press (Thermo Spectronic). The protein samples were clarified by centrifugation at 120000 × g for 20 min at 4 °C. GST fusion proteins were purified with a GST resin (Novagen), stored at 4 °C in glutathione elution buffer [50 mM Tris-HCl (pH 8.0), 10 mM glutathione reduced], and used for SDS/PAGE and western hybridization.

**SDS/PAGE and Protein Detection.** The protein samples were boiled 5 min with 1XSDS loading buffer and proteins were resolved by SDS/PAGE through 7 and 10% gels and visualized by staining with Coomassie brilliant blue G in 40% methanol-10% glacial acetic acid. Gels were destained and scanned. The amounts of purified proteins were determined by a Bradford assay (Bio-Rad), and equal amounts of protein were loaded on gels.

Proteins were transferred onto a nitrocellulose membrane (Bio-Rad) by protein gel blotting. The membrane was blocked to remove nonspecific binding using 8% skimmed milk powder in TBS-T (10 mM Tris-HCl, pH 7.5, 150 mM NaCl, and 0.1% [vol/vol] Triton X-100). An anti-MADA polyclonal antibody and an anti-MADB polyclonal antibody were used to 1:500 and 1:10000 dilution to detect MADA and MADB, respectively. Secondary antibody was used at 1:5000 dilutions and detected using anti-mouse or anti-rabbit antibody conjugated to horseradish peroxidase (Promega). To visualize a loading control, blots were stained with ponceau S (0.1% [wt/vol] in 1% [vol/vol] acetic acid). The data shown are representative of at least 3 independent experiments.

**Antibodies Against MADA and MADB.** Monospecific antibodies against MADA and MADB were produced by Pacific Immunology after injection of synthetic peptides conjugated to carrier protein (MADA: ADDVAMSDMTEEEV, amino acids 545–558; MADB: VHDEDEETNEQQKRV, amino acids 286–300) to New Zealand White Rabbits. The antibodies were purified from production bleeds with affinity columns before storage and use. Specific binding to MADA and MADB was observed with protein extracts from *E. coli* strains that expressed either protein, but not in protein extracts obtained from *E. coli* strains that carried control plasmids without *Phycomyces* DNA.

**Supplementary Legend to Fig. 1C.** Accession numbers for LOV and WC-2 proteins. WC-1 and LOV-domain photoreceptors: *Phycomyces blakesleeanus* MADA (ABB77846), *Phycomyces blakesleeanus* WCOA (ABB77844), *Phycomyces blakesleeanus* WCOB (CAQ76857), *Mucor circinelloides* MWC-1A (CAJ13843), *Mucor circinelloides* MWC-1B (CAJ13844), *Mucor circinelloides* MWC-1C (CAJ13845), *Ustilago maydis* WC-1 (XP\_400795), *Cryptococcus neoformans* BWC1 (AAT73612), *Coprinus cinereus* DST-1 (BAD99145), *Tuber borchii* WC-1 (CAE01390), *Magnaporthe grisea* WC-1 (XP\_360995), *Trichoderma atroviride* BLR-1 (AAU14171), *Neurospora crassa* WC-1 (CAA63964), *Podospora anserina* WC-1 (CAD60767), *Aspergillus nidulans* LREA (AAP47230), *Neurospora crassa* VVD (CAF06140), *Bacillus subtilis* YTVA (BAF91488), *Adiantum capillus-veneris* PHY3 LOV2 (BAA36192), *Arabidopsis thaliana* PHOT1-LOV2 (O48963.1); WC-2 proteins: *Phycomyces blakesleeanus* MADB (CAQ76858), *Phycomyces blakesleeanus* WCTB (CAQ76859), *Phycomyces blakesleeanus* WCTC (CAQ77079), *Phycomyces blakesleeanus* WCTD (CAQ76860), *Aspergillus nidulans* LREB (AAP47576.1), *Bipolaris oryzae* BLR2 (BAF47401.1), *Neurospora crassa* WC-2 (CAE81996.1), *Trichoderma atroviride* BLR2 (AAU14172.1), *Hypocrea jecorina* WC-2 (AAV80186.1).

**Supplementary Legend to Fig. 3C.** We used the *mad* strains C21 and C47 (*madA*), C111 (*madB*), L1 (*madC*), C149 (*madD*), C110 (*madE*), A329 (*madF*), C307 (*madG*), L83 (*madH*), L153 (*madI*), A909 (*madJ*), L51 (*madA madB*), and L72 (*madA madB madC*).

1. Scotto-Lavino E, Du G, Frohman MA (2006) 3' end cDNA amplification using classic RACE. *Nat Protoc* 1:2742–2745.
2. Marchler-Bauer A, Bryant SH (2004) CD-Search: Protein domain annotations on the fly. *Nucleic Acids Res* 32:W327–331.
3. Tamura K, Dudley J, Nei M, Kumar S (2007) MEGA4: Molecular Evolutionary Genetics Analysis (MEGA) software version 4.0. *Mol Biol Evol* 24:1596–1599.

4. Crosson S, Moffat K (2001) Structure of a flavin-binding plant photoreceptor domain: Insights into light-mediated signal transduction. *Proc Natl Acad Sci USA* 98:2995–3000.
5. Idnurm A, et al. (2006) The *Phycomyces madA* gene encodes a blue-light photoreceptor for phototropism and other light responses. *Proc Natl Acad Sci USA* 103:4546–4551.





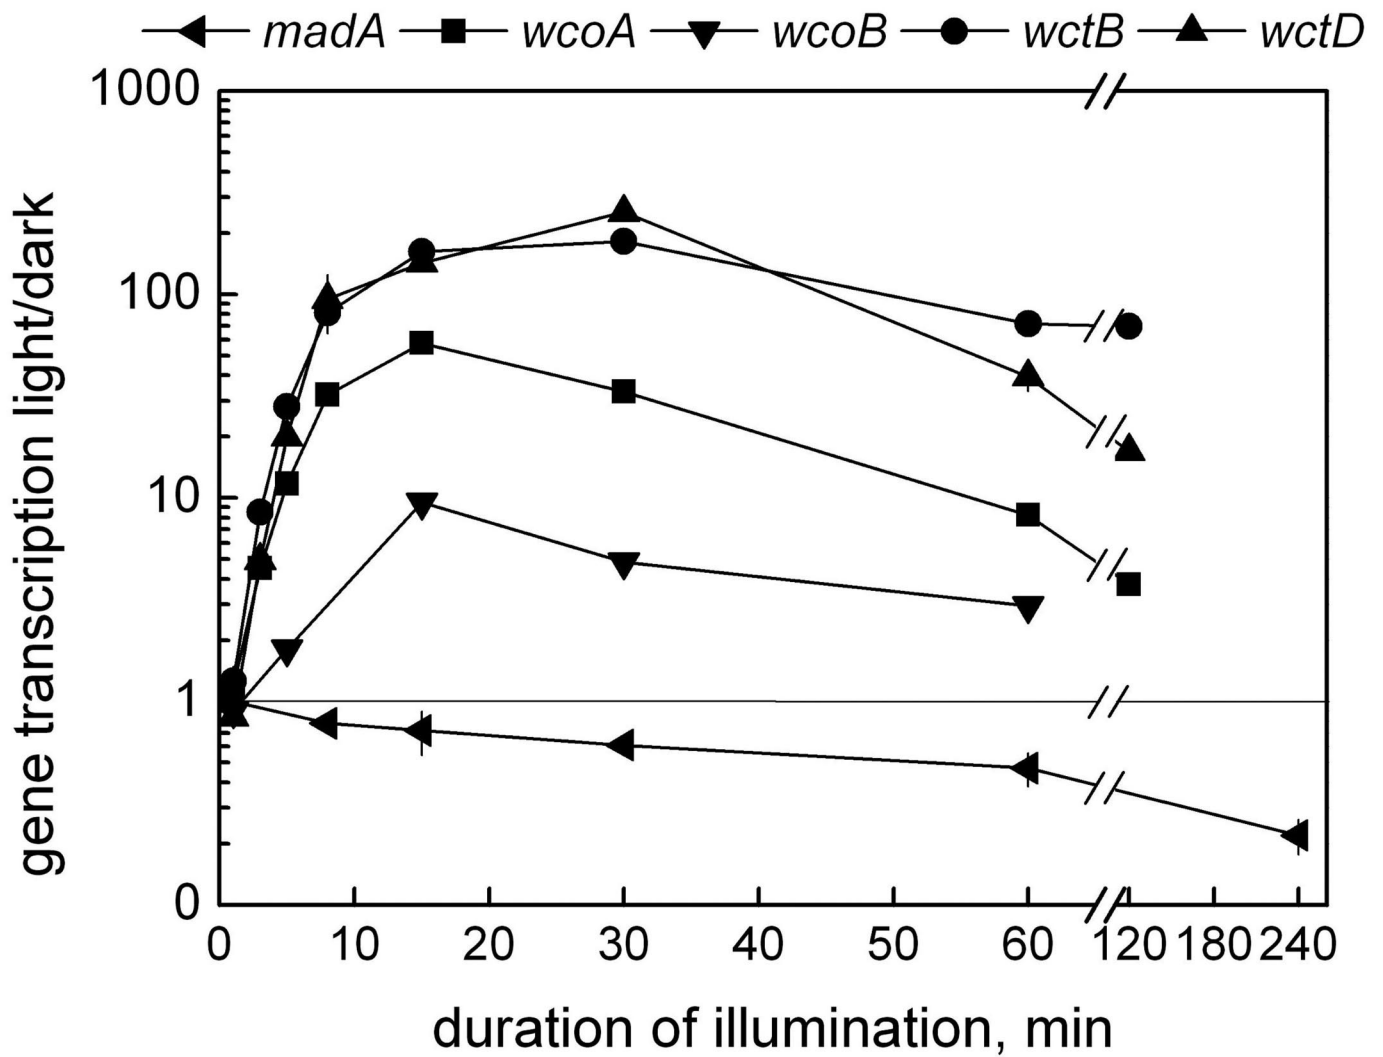

Fig. S3. Photoactivation of gene expression in the wild type after light exposures of different duration. Total RNAs were isolated from mycelia exposed to blue light for the times indicated, or kept in the dark. The amount of mRNA for each gene was assayed by quantitative RT-PCR. Each fluorescent signal was first normalized to the corresponding actin (*act-1*) signal to correct for loading errors and then was normalized to the signal obtained in the dark. The plots show the average and standard error of the mean of the relative photoactivation in 2–6 independent experiments.

- + POSITIVE INTERACTIONS. Cells grew on minimal media without uracil or histidine+10mM 3AT and became blue in a  $\beta$ -galactosidase filter assay .
- NEGATIVE INTERACTIONS. Cells did not grow on media lacking uracil or histidine + 10mM 3AT.

|                | MADA-AD        | WCOA-AD        | WCOB-AD        | MADB-AD        | WCTB-AD        | WCTD-AD        |
|----------------|----------------|----------------|----------------|----------------|----------------|----------------|
| <b>MADA-BD</b> | -<br>1 2 3<br> | -<br>1 2 3<br> | -<br>1 2 3<br> | +<br>1 2 3<br> | -<br>1 2 3<br> | -<br>1 2 3<br> |
| <b>WCOA-BD</b> | -<br>1 2 3<br> |
| <b>WCOB-BD</b> | -<br>1 2 3<br> |
| <b>MADB-BD</b> | +<br>1 2 3<br> | -<br>1 2 3<br> |
| <b>WCTB-BD</b> | -<br>1 2 3<br> |
| <b>WCTD-BD</b> | -<br>1 2 3<br> |

- 1 Synthetic Complete Medium without leucine and tryptophan (SC - Leu - Trp)
- 2 Synthetic Complete Medium without leucine, tryptophan and uracil (SC - Leu - Trp - Ura)
- 3 Synthetic Complete Medium without leucine, tryptophan and histidine + 10mM 3-Aminotriazole (SC - Leu - Trp - His + 10mM 3AT)

**Fig. S4.** MADA and MADB interact in yeast 2-hybrid assays. The coding regions of the *wc-1* genes *madA*, *wcoA*, and *wcoB*, and the *wc-2* genes *madB*, *wctB*, and *wctD* were fused adjacent to the AD and BD segments of *S. cerevisiae* *GAL4*. Plasmids were cotransformed into a *S. cerevisiae* strain in that the *GAL4* UAS regulates *URA3*, *HIS3*, and *lacZ* genes. Growth of strains in the absence of uracil or histidine and increased  $\beta$ -galactosidase activity as shown by a filter assay indicate protein-protein interactions. The gene *wctC* was not included because of our inability to isolate the corresponding cDNA or detect the *wctC* mRNA by PCR.



**Table S1. Strains of *Phycomyces blakesleeanus* used in this work**

| Strain*  | Genotype†                        | Origin‡           |
|----------|----------------------------------|-------------------|
| NRRL1555 | (-)                              |                   |
| UBC21    | (+)                              |                   |
| A56      | (+)                              | A32 X NRRL1555    |
| C21      | <i>madA7 pde-1</i> (-)           | NRRL1555, NTG     |
| C47      | <i>madA35</i> (-)                | NRRL1555, NTG     |
| A893     | <i>madA403</i> (-)               | NRRL1555, NTG     |
| A896     | <i>madA403 nicA101</i> (+)       | A893 X C247       |
| C109     | <i>madB101</i> (-)               | NRRL1555, NTG     |
| C111     | <i>madB103</i> (-)               | NRRL1555, NTG     |
| C112     | <i>madB104</i> (-)               | NRRL1555, NTG     |
| C114     | <i>madB106</i> (-)               | NRRL1555, NTG     |
| A457     | <i>madB106 nicA101</i> (+)       | A178 X S102       |
| A458     | <i>madB106 nicA101</i> (+)       | A178 X S102       |
| A459     | <i>madB106 nicA101</i> (-)       | A178 X S102       |
| A178     | <i>madB106</i> (+)               | A56 X C114        |
| A179     | <i>madB106</i> (+)               | A56 X C114        |
| A269     | <i>madB103</i> (+)               | A56 X C111        |
| A271     | <i>madB103</i> (-)               | A56 X C111        |
| A273     | <i>madB104</i> (+)               | A56 X C112        |
| A276     | <i>madB104</i> (-)               | A56 X C112        |
| A754     | <i>madB104 nicB401</i> (-)       | A532 X C112       |
| A820     | <i>madB106 uraA</i> (+)          | A520 X C169       |
| A821     | <i>madB106 uraA</i> (+)          | A520 X C169       |
| L1       | <i>madC119</i> (-)               | C264 X C148       |
| A202     | <i>madC469</i> (-)               | A56 X B24         |
| B2       | <i>madC452</i> (-)               | NRRL1555, ICR170  |
| A429     | <i>madC452 nicA101</i> (+)       | A146 X S102       |
| A905     | <i>madC406</i> (-)               | NRRL1555, ICR170  |
| A34      | <i>madD120 furA401</i> (+)       | B71 X C149        |
| A279     | <i>madD120</i> (-)               | A56 X C149        |
| B27      | <i>madD471</i> (-)               | NRRL1555, ICR 170 |
| C68      | <i>madD59</i> (-)                | NRRL1555, NTG     |
| C149     | <i>madD120</i> (-)               | NRRL1555, NTG     |
| A767     | <i>madE102 nicB401</i> (-)       | A532 X C110       |
| C110     | <i>madE102</i> (-)               | NRRL1555, NTG     |
| L157     | <i>madE720</i> (-)               | NRRL1555, NTG     |
| L163     | <i>madE726</i> (-)               | NRRL1555, NTG     |
| A327     | <i>madF48 nicA101</i> (+)        | A56 X C316        |
| L161     | <i>madF724</i> (-)               | NRRL1555, NTG     |
| A329     | <i>madF48</i> (-)                | A56 X C316        |
| A281     | <i>madG131</i> (+)               | A56 X C307        |
| C288     | <i>madG131</i> (+)               | C107 X C264       |
| C307     | <i>madG131</i> (-)               | C288 X NRRL1555   |
| L83      | <i>madH703</i> (-)               | NRRL1555, NTG     |
| L85      | <i>madH705</i> (-)               | NRRL1555, NTG     |
| L151     | <i>madI714</i> (-)               | NRRL1555, NTG     |
| L153     | <i>madI716</i> (-)               | NRRL1555, NTG     |
| A914     | <i>madI712, lysA401</i> (-)      | A637 X A845       |
| A909     | <i>madJ407</i> (-)               | NRRL1555, NTG     |
| A917     | <i>madJ407 purA51</i> (-)        | A543 X A909       |
| L52      | <i>madA7 madC119</i> (-)         | L2 x C21          |
| L51      | <i>madA7 madB103</i> (-)         | C303 X C21        |
| L72      | <i>madA7 madB103 madC119</i> (-) | L2 x L51          |
| A818     | <i>uraA</i> (+)                  | A520 X C169       |
| A819     | <i>uraA</i> (+)                  | A520 X C169       |

\*Strains with prefix A come from Prof. Arturo P. Eslava (Universidad de Salamanca, Spain); C, from the late Prof. M. Delbrück (California Institute of Technology, Pasadena, CA, U.S.A.); L, from Prof. E. D. Lipson (Department of Physics, Syracuse University, Syracuse, NY, U.S.A.); S, from Prof. Cerdá-Olmedo (Universidad de Sevilla, Spain).

†Mutations labelled *mad* affect the phototropism of the sporangiophore; *pde*, cAMP phosphodiesterase; *car*, beta-carotene biosynthesis; *nic*, biosynthesis of nicotinic acid; *ura*, biosynthesis of uracil; *fur*, resistance to 5-fluorouracil; *lys*, biosynthesis of lysine. The mating type is indicated by the symbol (-) or (+).

‡The standard wild type NRRL1555 was obtained originally from the Northern Regional Research Laboratory, USDA, Peoria, IL, USA. A56 is the (+) isogenic strain of NRRL1555. Mutants were obtained previously by N-methyl-N'-nitro-N-nitrosoguanidine mutagenesis (NTG) or by 2-methoxy-6-chloro-9-[3-(ethyl-2-chloro-ethyl) aminopropylamino] acridine-2HCl mutagenesis (ICR170).

**Table S2. Oligonucleotides used in this work**

| Name                                                                                      | Sequence (5'-3')                       | Position*       |
|-------------------------------------------------------------------------------------------|----------------------------------------|-----------------|
| Primers for <i>wctA</i> cloning                                                           |                                        |                 |
| WC2 1R                                                                                    | CCARCGNARNCCRCANGCRTTRCA (aa CNACGLRW) |                 |
| WC2 1F                                                                                    | TTCMSNMRNMGNAARAAYTGG (aa FRRRKNW)     |                 |
| Primers for amplification for subsequent sequencing <i>wc</i> genes in <i>mad</i> mutants |                                        |                 |
| madAF                                                                                     | CGTTAATTCATCATGGATTCCTTCTCATCTTACC     | -12 to + 22     |
| madAR                                                                                     | GCCTTGCATTATGTTCCATTGCAGTGGTTT         | +2569 to + 2539 |
| wcoAF                                                                                     | CATATATTACAATGCCTCAGTACTGTGACATATC     | -11 to + 23     |
| wcoAR                                                                                     | GGATTAGATTTAGATGGCTGTGATTTAGGCC        | +2385 to + 2354 |
| wcoBF                                                                                     | CTCTTACTGTGTGACTTCTCGCATATT            | -238 to -212    |
| wcoBR                                                                                     | GAGTATCCAAGTTATTTCCAAGCAA              | +3049 to + 3025 |
| madBF                                                                                     | GGCAAATCCGTAGGCTCACAACA                | -237 to -215    |
| madBR                                                                                     | CGCGATAGCGATTATACACTATGGG              | +1403 to + 1379 |
| wctBF                                                                                     | CTGCACCTCCTTGCCTATTCC                  | -78 to -56      |
| wctBR                                                                                     | GGTCTTACCTCAGTGAATG                    | +1548 to + 1528 |
| wctCF                                                                                     | GAACAATTGGCACGCTTAGTTCGTA              | -500 to -476    |
| wctCR                                                                                     | GGTATTGATGAGGGAGGACGACTA               | +1430 to + 1407 |
| wctDF                                                                                     | ACATACCTCTGTACATT                      | -68 to -50      |
| wctDR                                                                                     | AGGGATCACTAGGATCTCAC                   | +1510 to + 1491 |
| Primers for ORF confirmation                                                              |                                        |                 |
| wctB-1F                                                                                   | TCTTGCCTATTCCCAAAGAC                   |                 |
| wctB-1R                                                                                   | TGACTTGCCAAATCGTATAC                   |                 |
| wctD-1F                                                                                   | CATTTACATACCTCTGTACATT                 |                 |
| wctD-1R                                                                                   | GAATTGGGATCACTAGGATC                   |                 |
| wctA-1F                                                                                   | TCCTACAACCTGTCTTTCAC                   |                 |
| wctA-1R                                                                                   | ATCCAACATACGTGTGTAC                    |                 |
| wcoB-R5                                                                                   | CACAGTGGTTATGTCAGAGG                   |                 |
| wcoB-4F                                                                                   | GTACGCCATGAATCCCTTTG                   |                 |
| wcoB-F3                                                                                   | TTGGCATGAGCTGCTACTTG                   |                 |
| wcoB-3R                                                                                   | TGTCCATAGGTTCCACACT                    |                 |
| wcoB-RACE3                                                                                | GCCGGGCTGATGCAGTGCCTGTTCTGGG           |                 |
| wcoB-5R                                                                                   | CTACAAGCGCCGCATAGTAC                   |                 |
| Primers for <i>madB</i> genotyping                                                        |                                        |                 |
| JOHE18108                                                                                 | CTTCATACGATATGCTTGAG                   |                 |
| JOHE18109                                                                                 | TTGCTTGTCTTTGCCAACG                    |                 |
| Primers for quantitative PCR                                                              |                                        |                 |
| act-11                                                                                    | AGGCTGTCCTTTCCCTTACG                   |                 |
| act-12                                                                                    | GACACCATCACCGGAATCG                    |                 |
| hspA1                                                                                     | CGAATTCTCGCACACTCTCTTG                 |                 |
| hspA2                                                                                     | CTGTCCGTCAACATCGTCAAA                  |                 |
| madA1                                                                                     | AGTGAAGATGTGGTCCGGTACTC                |                 |
| madA2                                                                                     | TGTCAAGAACGTAACGGAAGATTG               |                 |
| madB1                                                                                     | GCCATTTCTCAAAGGATGTTTCT                |                 |
| madB2                                                                                     | TGTGTCCATCATGCGAGTAGACT                |                 |
| wcoA1                                                                                     | GAAGGAGCCTCGATTTACCAATATAT             |                 |
| wcoA2                                                                                     | TTGGCGGACCAGGTCAAA                     |                 |
| wcoB1                                                                                     | GCAACTTCTTTTCGCTCAAGA                  |                 |
| wcoB2                                                                                     | CATGGCTCCACTGTTCTGTTGT                 |                 |
| wctB1                                                                                     | GCTATTAGGTTACCAGCCCTCAGA               |                 |
| wctB2                                                                                     | CCTCGCCGTCGTGAATG                      |                 |
| wctC1                                                                                     | TGCAGGACCATCAATACACACA                 |                 |
| wctC2                                                                                     | GGATTCGTGGAGATTGTCTTGAA                |                 |
| wctD1                                                                                     | CGGCCACTACCCACATGAG                    |                 |
| wctD2                                                                                     | ACGTCCAGATCGTCGATATGC                  |                 |

\*Position from the initiation ATG
